# Supplementary material for: Mitochondrial Genome Sequencing in Mesolithic North East Europe Unearths a New Sub-Clade within the Broadly Distributed Human Haplogroup C1
Source: PubMed Central journal article supplement (PMC3913659; doi:10.1371/journal.pone.0087612), 2014-02-04
Supplement: pone.0087612.s002.pdf [file pone.0087612.s002.pdf]

**A**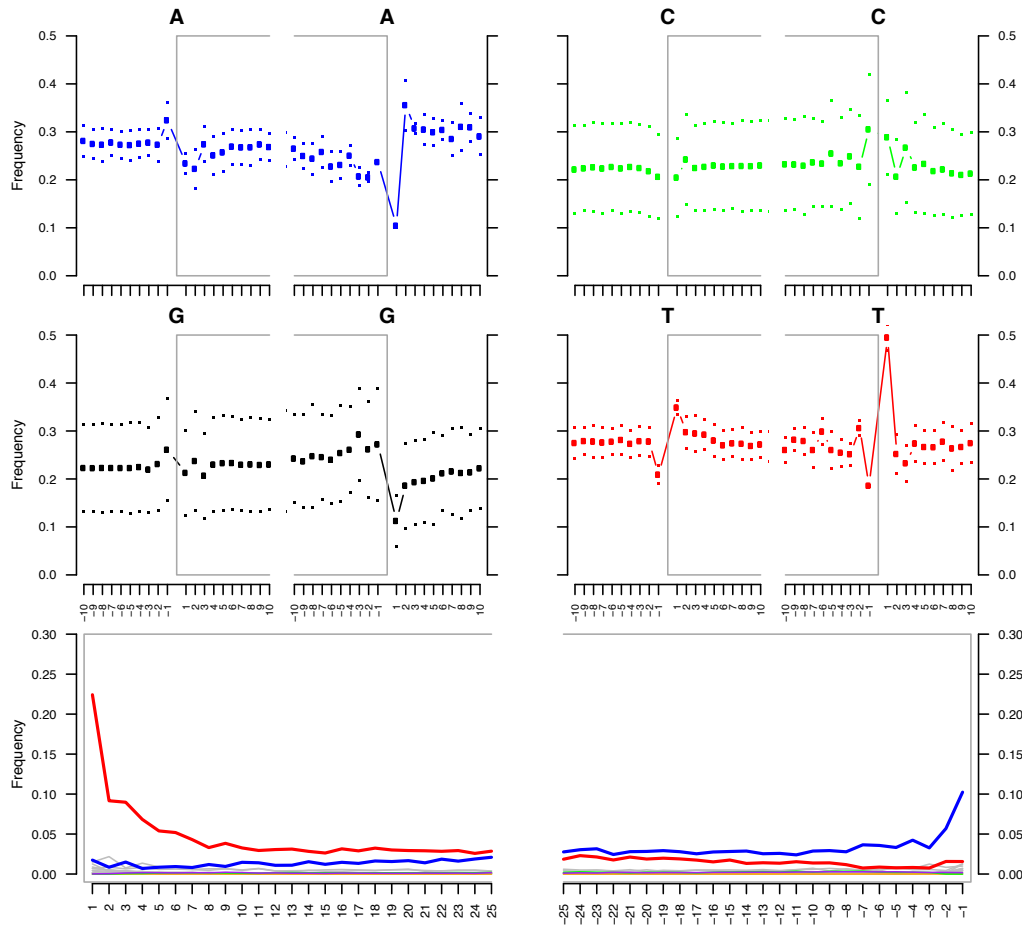**B**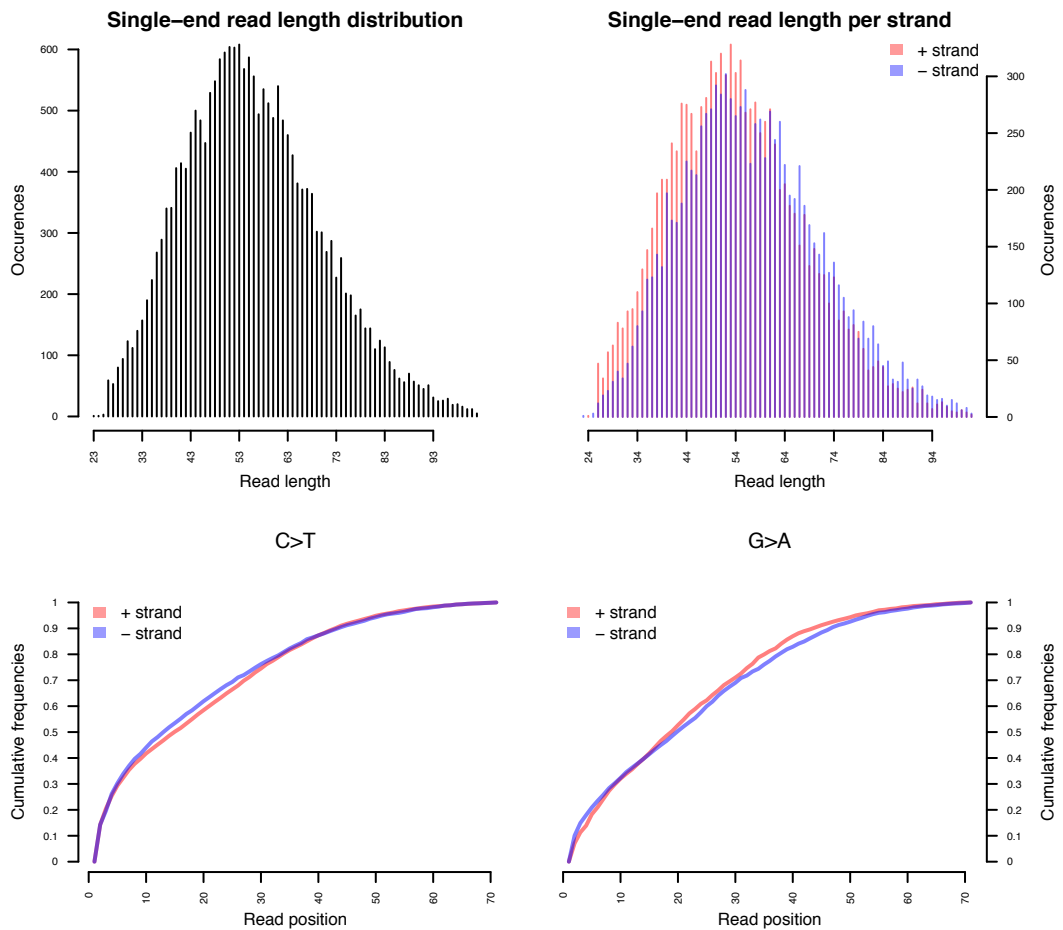

**C**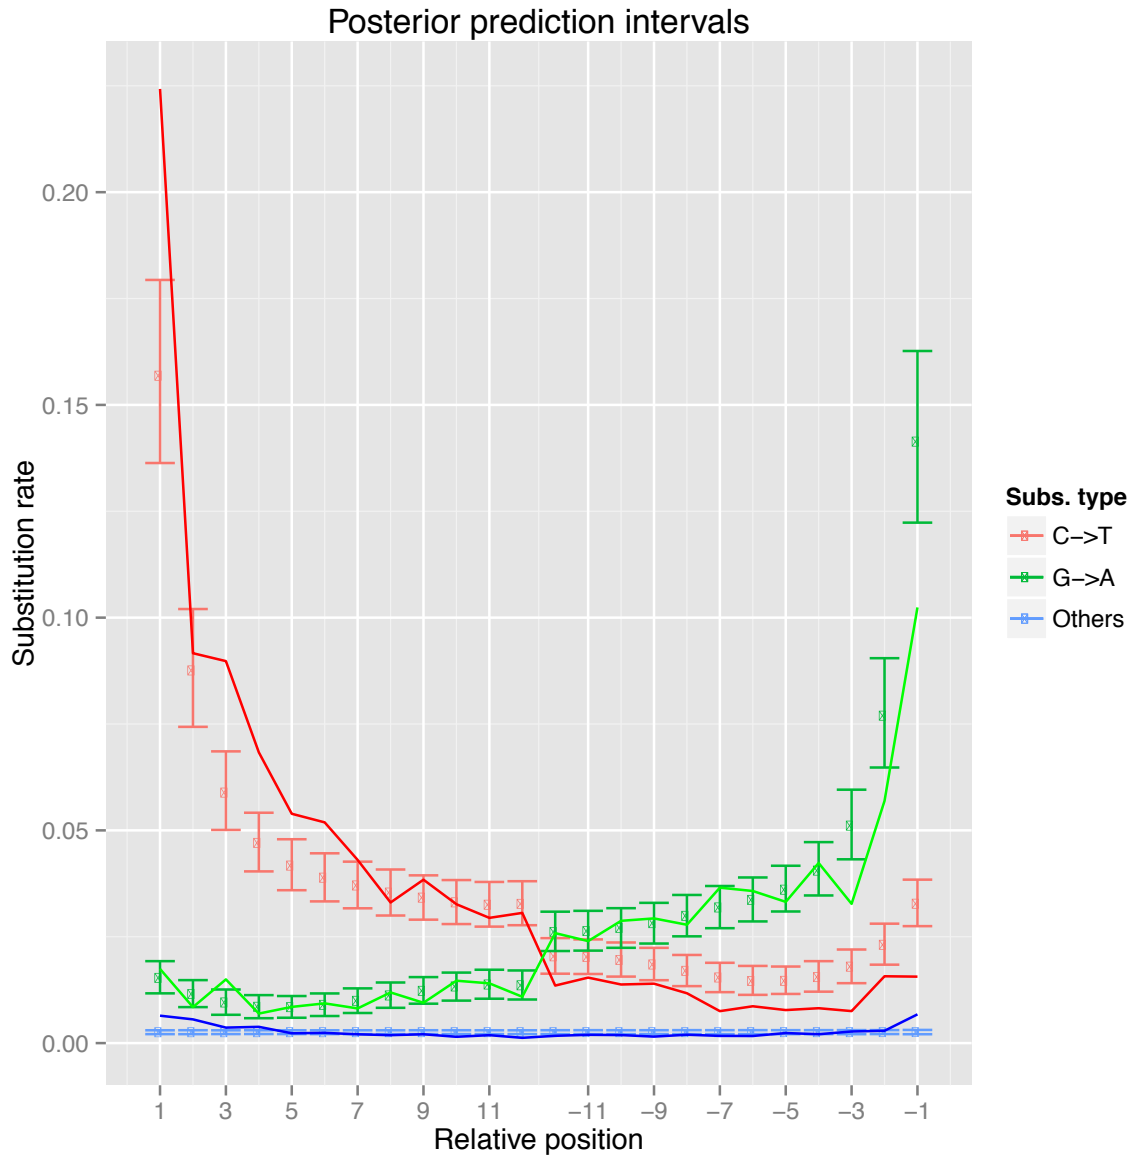**D**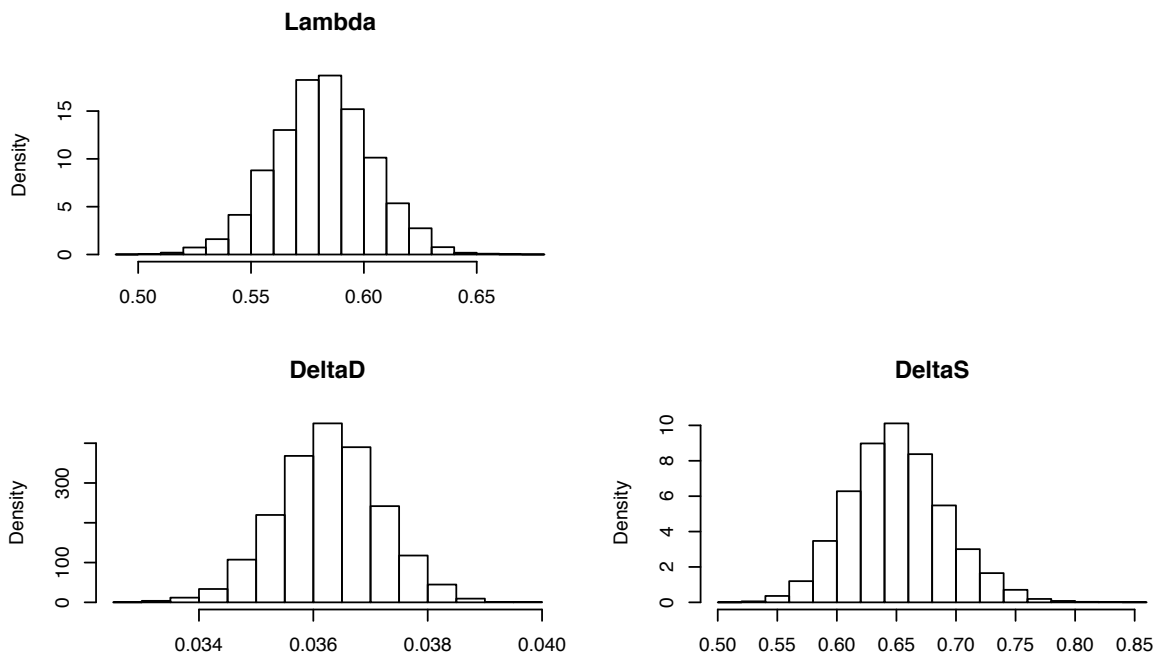**Figure S2**
