# Supplementary material for: Mitochondrial Genome Sequencing in Mesolithic North East Europe Unearths a New Sub-Clade within the Broadly Distributed Human Haplogroup C1
Source: PubMed Central journal article supplement (PMC3913659; doi:10.1371/journal.pone.0087612), 2014-02-04
Supplement: pone.0087612.s003.pdf [file pone.0087612.s003.pdf]

Table S1. Primer sequences.

|                                | Primer name | Primer sequence (5' - 3') | Positions of the targeted fragment | Fragment size (base pair)    | Reference                          |                           |            |
|--------------------------------|-------------|---------------------------|------------------------------------|------------------------------|------------------------------------|---------------------------|------------|
| <b>Hypervariable Region I</b>  |             |                           |                                    |                              |                                    |                           |            |
|                                | L15996      | CTCCACCATTAGCACCCAAAGC    | 15977 - 16161                      | 185                          | [1]                                |                           |            |
|                                | H16142      | ATGTACTACAGGTGGTCAAG      |                                    |                              | [2]                                |                           |            |
|                                | L16117      | TACATTACTGCCAGCCACCAT     | 16097 - 16237                      | 141                          | [3]                                |                           |            |
|                                | H16218      | TGTGTGATAGTTGAGGGTTG      |                                    |                              | [4]                                |                           |            |
|                                | L16209      | CCCCATGCTTACAAGCAAGT      | 16190 - 16322                      | 133                          | [4]                                |                           |            |
|                                | H16303      | TGGCTTTATGTACTATGTAC      |                                    |                              | [4]                                |                           |            |
|                                | L16287      | CACTAGGATACCAACAAACC      | 16268 - 16429                      | 162                          | [4]                                |                           |            |
|                                | H16410      | GCGGGATATTGATTCACGG       |                                    |                              | [4]                                |                           |            |
| <b>Hypervariable Region II</b> |             |                           |                                    |                              |                                    |                           |            |
|                                | L00205      | ACAGGCGAACATACTACTAAAGTG  | 00181 - 00261                      | 105                          | This study                         |                           |            |
|                                | H00261      | GTTATGATGTCTGTGTGGAAAGTGG |                                    |                              | This study                         |                           |            |
|                                | L00270      | TGAATGTCTGCACAGCCACTTTCCA | 00246 - 00350                      | 105                          | This study                         |                           |            |
|                                | H00327      | TTGGCAGAGATGTGTTTAAGTGCT  |                                    |                              | [5]                                |                           |            |
| <b>Coding Region</b>           |             |                           |                                    |                              |                                    |                           |            |
|                                | Haplogroup  | Targeted SN               | Primer name                        | Primer sequence (5' - 3')    | Positions of the targeted fragment | Fragment size (base pair) | Reference  |
|                                | C1f         | 8577                      | L8562                              | TTCGCTTCATTCATTGCCCCC        | 08542 - 08624                      | 110                       | This study |
|                                |             |                           | H8624                              | AGTCGGTTGTTGATGAGATATTTGGAGG |                                    |                           | This study |
|                                | C           | 9545                      | L9524                              | CTGAGCCTTTTACCACTCCAGCCTA    | 09500 - 09559                      | 83                        | This study |
|                                |             |                           | H9559                              | GATTTAGCGGGGTGATGCCTGTTG     |                                    |                           | This study |
|                                | C1f         | 11605                     | L11595                             | ACAAGCTCCATCTGCCTACGACA      | 11573 - 11631                      | 80                        | This study |
|                                |             |                           | H11631                             | ACTACGAGGGCTATGTGGCTGA       |                                    |                           | This study |
|                                | C1f         | 12217                     | L12197                             | TGACAACAGAGGCTTACGACCCC      | 12175 - 12197                      | 68                        | This study |
|                                |             |                           | H12223                             | TGGGGGCATGAGTTAGCAGT         |                                    |                           | This study |

## REFERENCES

1. Vigilant L, Stoneking M, Harpending H, Hawkes K, Wilson AC. (1991) African populations and the evolution of human mitochondrial DNA. *Science* 253(5027):1503-7.
2. Stone AC, Stoneking M. (1998) mtDNA analysis of a prehistoric Oneota population: implications for the peopling of the New World. *Am J Hum Genet* 62(5):1153-70.
3. Haak W, Forster P, Bramanti B, Matsumura S, Brandt G, et al. (2005) Ancient DNA from the first European farmers in 7500-year-old Neolithic sites. *Science* 310: 1016-1018.
4. Handt O, Krings M, Ward RH, Pääbo S. (1996) The retrieval of ancient human DNA sequences. *Am J Hum Genet* 59(2):368-76.
5. Haak W, Brandt G, de Jong HN, Meyer C, Ganslmeier R, et al. (2008) Ancient DNA, Strontium isotopes, and osteological analyses shed light on social and kinship organization of the Later Stone Age. *Proc Natl Acad Sci U S A* 105(47):18226-31.
