# Supplementary material for: Mitochondrial Genome Sequencing in Mesolithic North East Europe Unearths a New Sub-Clade within the Broadly Distributed Human Haplogroup C1
Source: PubMed Central journal article supplement (PMC3913659; doi:10.1371/journal.pone.0087612), 2014-02-04
Supplement: pone.0087612.s004.pdf [file pone.0087612.s004.pdf]

**Table S2. Haplogroup C1 mitochondrial sequences used to construct control region and complete mitochondrial genome C1 phylogenies.**

| <b>C1 clade</b>                         | <b>Geographic /Ethnic origin</b> | <b>Reference</b> | <b>GenBank accession number</b> |
|-----------------------------------------|----------------------------------|------------------|---------------------------------|
| <b>Hypervariable Region I sequences</b> |                                  |                  |                                 |
| C1?                                     | Lebanese                         | [1]              |                                 |
| C1?                                     | Lebanese                         | [1]              |                                 |
| C1?                                     | Bashkir                          | [2]              |                                 |
| C1?                                     | Bashkir                          | [2]              |                                 |
| C1?                                     | Bashkir                          | [2]              |                                 |
| C1?                                     | Icelander                        | [3]              |                                 |
| C1?                                     | Icelander                        | [3]              |                                 |
| C1?                                     | Icelander                        | [4]              |                                 |
| C1?                                     | Thai                             | [5]              |                                 |
| C1?                                     | Indian                           | [6]              |                                 |
| C1?                                     | Indian                           | [6]              |                                 |
| C1?                                     | Indian                           | [6]              |                                 |
| C1?                                     | Indian                           | [6]              |                                 |
| C1?                                     | Indian                           | [6]              |                                 |
| C1?                                     | Germany                          | [7]              |                                 |
| C1?                                     | Canary Islander                  | [8]              |                                 |
| C1a                                     | Altaiian                         | [1]              |                                 |
| C1a                                     | Altaiian                         | [1]              |                                 |
| C1a                                     | Orok                             | [9]              |                                 |
| C1a                                     | Orok                             | [9]              |                                 |
| C1a                                     | Orok                             | [9]              |                                 |
| C1a                                     | Orok                             | [9]              |                                 |
| C1a                                     | Orok                             | [9]              |                                 |
| C1a                                     | Orok                             | [9]              |                                 |
| C1a                                     | Orok                             | [9]              |                                 |
| C1a                                     | Highland Kirghiz                 | [10]             |                                 |
| C1a                                     | Japanese                         | [11]             |                                 |
| C1a                                     | Japanese                         | [12]             |                                 |
| C1a                                     | Japanese                         | [12]             |                                 |
| C1a                                     | Mongolian                        | [13]             |                                 |
| C1a                                     | Mongolian                        | [13]             |                                 |
| C1a                                     | Daur                             | [14]             |                                 |
| C1a                                     | Korea                            | [15]             |                                 |
| C1a                                     | Kalmyk                           | [16]             |                                 |
| C1a                                     | Kalmyk                           | [16]             |                                 |
| C1a                                     | Buryat                           | [17]             |                                 |
| C1a                                     | Buryat                           | [17]             |                                 |
| C1a                                     | Buryat                           | [17]             |                                 |
| C1a                                     | Buryat                           | [17]             |                                 |
| C1a                                     | Buryat                           | [17]             |                                 |

| <b>C1 clade</b>                       | <b>Geographic / Ethnic origin</b> | <b>Reference</b> | <b>GenBank accession number</b> |
|---------------------------------------|-----------------------------------|------------------|---------------------------------|
| C1a                                   | Buryat                            | [17]             |                                 |
| C1a                                   | Ulchi                             | [18]             |                                 |
| C1a                                   | Starikovskaya                     | [18]             |                                 |
| C1a                                   | Japanese                          | [19]             |                                 |
| C1a                                   | Buryat                            | [19]             |                                 |
| C1a                                   | Japanese                          | [20]             |                                 |
| <b>Complete mitochondrial genomes</b> |                                   |                  |                                 |
| C1a                                   | Japanese                          | [20]             | AP008311                        |
| C1a                                   | Ulchi, Siberia                    | [18]             | AY519496                        |
| C1a                                   | Buryat, Siberia                   | [21]             | EF153779                        |
| C1a                                   | Nanaitci, Siberia                 | [22]             | EU007858                        |
| C1b                                   | Canary                            | [23]             | AF382009                        |
| C1b                                   | North America                     | [24]             | AY195759                        |
| C1b                                   | Hispanic                          | [25]             | DQ282447                        |
| C1b                                   | Hispanic                          | [25]             | DQ282448                        |
| C1b                                   | Hispanic                          | [25]             | DQ282449                        |
| C1b                                   | Hispanic                          | [25]             | DQ282450                        |
| C1b                                   | Hispanic                          | [25]             | DQ282451                        |
| C1b                                   | Hispanic                          | [25]             | DQ282452                        |
| C1b                                   | Hispanic                          | [25]             | DQ282453                        |
| C1b                                   | Hispanic                          | [25]             | DQ282454                        |
| C1b                                   | Hispanic                          | [25]             | DQ282455                        |
| C1b                                   | Hispanic                          | [25]             | DQ282456                        |
| C1b                                   | Hispanic                          | [25]             | DQ282457                        |
| C1b                                   | Hispanic                          | [25]             | DQ282458                        |
| C1b                                   | Hispanic                          | [25]             | DQ282461                        |
| C1b                                   | Hispanic                          | [25]             | DQ282464                        |
| C1b                                   | Hispanic                          | [25]             | DQ282469                        |
| C1b                                   | Hispanic                          | [25]             | DQ282475                        |
| C1b                                   | Hispanic                          | [25]             | DQ282476                        |
| C1b                                   | South America, Zoro               | [26]             | EU095223                        |
| C1b                                   | South America, Zoro               | [26]             | EU095224                        |
| C1b                                   | South America, Quechua,           | [26]             | EU095225                        |
| C1b                                   | South America, Quechua            | [26]             | EU095226                        |
| C1b                                   | Brazil, Arara                     | [26]             | EU095227                        |
| C1b                                   | South America, Poturujara,        | [26]             | EU095228                        |
| C1b                                   | Brazil/Venezuela, Yanomamö        | [26]             | EU095229                        |
| C1b                                   | Brazil/Venezuela, Yanomamö        | [26]             | EU095230                        |
| C1b                                   | Brazil/Venezuela, Yanomamö,       | [26]             | EU095231                        |
| C1b                                   | Colombia/Venezuela, Wayuu         | [27]             | EU095549                        |
| C1b                                   | United States                     | [28]             | EU431085                        |
| C1b                                   | Mexico, Pima                      | [29]             | EU597545                        |

| <b>C1 clade</b> | <b>Geographic / Ethnic origin</b> | <b>Reference</b> | <b>GenBank accession number</b> |
|-----------------|-----------------------------------|------------------|---------------------------------|
| C1b             | Mexico, Pima                      | [29]             | EU597557                        |
| C1b             | Mexico                            | [30]             | HQ012197                        |
| C1b             | Mexico                            | [30]             | HQ012236                        |
| C1b             | Mexico                            | [30]             | HQ012210                        |
| C1b             | Mexico                            | [30]             | HQ012202                        |
| C1b             | Mexico                            | [30]             | HQ012208                        |
| C1b             | Mexico                            | [30]             | HQ012212                        |
| C1b             | Unknown                           | [31]             | JQ702984                        |
| C1b             | Unknown                           | [31]             | JQ705451                        |
| C1b             | Unknown                           | [31]             | JQ701891                        |
| C1b             | Unknown                           | [31]             | JQ705153                        |
| C1b             | Chile                             | [32]             | JX413036                        |
| C1b             | Chile                             | [32]             | JX413037                        |
| C1b             | Chile                             | [32]             | JX413038                        |
| C1b             | Chile                             | [32]             | JX413039                        |
| C1b             | Chile                             | [32]             | JX413040                        |
| C1b             | Chile                             | [32]             | JX413041                        |
| C1b             | Chile                             | [32]             | JX413042                        |
| C1b             | Chile                             | [32]             | JX413043                        |
| C1b             | Chile                             | [32]             | JX413044                        |
| C1b             | Chile                             | [32]             | JX413045                        |
| C1b             | Chile                             | [32]             | JX413046                        |
| C1b             | Chile                             | [32]             | JX413047                        |
| C1b             | Chile                             | [32]             | JX413048                        |
| C1b             | Chile                             | [32]             | JX413049                        |
| C1b             | Chile                             | [32]             | JX413050                        |
| C1b             | Chile                             | [32]             | JX413051                        |
| C1b             | Chile                             | [32]             | JX413052                        |
| C1b             | Chile                             | [32]             | JX413053                        |
| C1b             | Chile                             | [32]             | JX413054                        |
| C1b             | Chile                             | [32]             | JX413055                        |
| C1b             | Chile                             | [32]             | JX413056                        |
| C1c             | South America, Arsario            | [27]             | EU095527                        |
| C1c             | Colombia, Kogui                   | [27]             | EU095544                        |
| C1c             | Dominican Republic                | [28]             | EF079875                        |
| C1c             | Canada                            | [28]             | EU431086                        |
| C1c             | United States                     | [28]             | EU431087                        |
| C1c             | Hispanic                          | [25]             | DQ282459                        |
| C1c             | Hispanic                          | [25]             | DQ282460                        |
| C1c             | Hispanic                          | [25]             | DQ282462                        |
| C1c             | Hispanic                          | [25]             | DQ282463                        |
| C1c             | Hispanic                          | [25]             | DQ282465                        |

| <b>C1 clade</b> | <b>Geographic / Ethnic origin</b> | <b>Reference</b> | <b>GenBank accession number</b> |
|-----------------|-----------------------------------|------------------|---------------------------------|
| C1c             | Hispanic                          | [25]             | DQ282466                        |
| C1c             | Hispanic                          | [25]             | DQ282467                        |
| C1c             | Hispanic                          | [25]             | DQ282468                        |
| C1c             | Hispanic                          | [25]             | DQ282470                        |
| C1c             | Hispanic                          | [25]             | DQ282471                        |
| C1c             | Unknown                           | [33]             | EU327891                        |
| C1c             | Unknown                           | [33]             | EU327973                        |
| C1c             | Unknown                           | [33]             | EU617323                        |
| C1c             | Mexico                            | [30]             | HQ012230                        |
| C1c             | Mexico                            | [30]             | HQ012223                        |
| C1c             | Unknown                           | [31]             | JQ704040                        |
| C1c             | Unknown                           | [31]             | JQ705574                        |
| C1c             | Unknown                           | [31]             | JQ703827                        |
| C1d             | Venezuela/Guyana, Warao           | [34]             | AF347012                        |
| C1d             | Venezuela/Guyana, Warao           | [34]             | AF347013                        |
| C1d             | Colombia, Corequaje               | [27]             | EU095537                        |
| C1d             | Hispanic                          | [25]             | DQ282472                        |
| C1d             | Hispanic                          | [25]             | DQ282473                        |
| C1d             | Hispanic                          | [25]             | DQ282474                        |
| C1d             | Brazil/Guyana, WaiWai             | [26]             | EU095222                        |
| C1d             | Canada, British Columbia          | [35]             | GU215075                        |
| C1d             | Colombia, Mestizos                | [36]             | HM107313                        |
| C1d             | Colombia, Mestizos                | [36]             | HM107314                        |
| C1d             | Colombia, Mestizos                | [36]             | HM107315                        |
| C1d             | USA, Montana                      | [36]             | HM107319                        |
| C1d             | Mexico, Zacatecas                 | [36]             | HM107321                        |
| C1d             | Mexico, Sonora                    | [36]             | HM107322                        |
| C1d             | Argentina, Salta                  | [36]             | HM107323                        |
| C1d             | Argentina, Buenos Aires,          | [36]             | HM107327                        |
| C1d             | Argentina, Buenos Aires           | [36]             | HM107329                        |
| C1d             | Mexico, Oaxaca                    | [36]             | HM107334                        |
| C1d             | USA, Texas,                       | [36]             | HM107335                        |
| C1d             | Argentina, Buenos Aires           | [36]             | HM107346                        |
| C1d             | Uruguay                           | [36]             | HM107348                        |
| C1d             | Chile, Bio-bío                    | [36]             | HM107350                        |
| C1e             | Icelandic                         | [37]             |                                 |
| C1e             | Icelandic                         | [37]             |                                 |
| C1e             | Icelandic                         | [37]             |                                 |

## References

1. Balanovsky, personal communication
2. Bermisheva M, Tambets K, Villems R, Khusnutdinova E (2002) Diversity of mitochondrial DNA haplotypes in ethnic populations of the Volga-Ural region of Russia. *Mol Biol* 36: 990-1001.
3. Helgason A, Sigurdardóttir S, Gulcher JR, Ward R, Stefánsson K (2000) mtDNA and the origin of the Icelanders: deciphering signals of recent population history. *Am J Hum Genet* 66:999-1016.
4. Helgason A, Nicholson G, Stefánsson K, Donnelly P (2003) A reassessment of genetic diversity in Icelanders: strong evidence from multiple loci for relative homogeneity caused by genetic drift. *Ann Hum Genet* 67:281-297.
5. Kutanan W, Kampuansi J, Fuselli S, Nakbunlung S, Seieslstad M et al. (2011) Genetic structure of the Mon-Khmer speaking groups and their affinity to the neighbouring Tai populations in Northern Thailand. *BMC Genet.* 12:56.
6. Metspalu M, Kivisild T, Metspalu E, Parik J, Hudjashov G, et al. (2004) Most of the extant mtDNA boundaries in south and southwest Asia were likely shaped during the initial settlement of Eurasia by anatomically modern humans. *BMC Genet* 5:26.
7. Pfeiffer H, Brinkmann B, Hühne J, Rolf B, Morris A A, et al. (1999) Expanding the forensic German mitochondrial DNA control region database: genetic diversity as a function of sample size and microgeography. *Int J Legal Med* 112:291-298.
8. Rando JC, Cabrera VM, Larruga JM, Hernandez M, Gonzalez AM, et al. (1999). Phylogeographic patterns of mtDNA reflecting the colonization of the Canary Islands. *Ann Hum Genet* 63:413-428.

9. Bermisheva MA, Kutuev IA, Spitsyn VA, Villems R, Batyrova AZ, et al. (2005) Analysis of mitochondrial DNA variation in the population of Oroks. *Genetika* 41:78-84.
10. Comas D, Calafell F, Mateu E, Pérez-Lezaun A, Bosch E, et al. (1998) Trading genes along the silk road: mtDNA sequences and the origin of Central Asian populations. *Am J Hum Genet* 63:1824-1838.
11. Horai S, Hayasaka K (1990) Intraspecific nucleotide sequence differences in the major noncoding region of human mitochondrial DNA. *Am J Hum Genet* 46:828-42.
12. Imaizumi K, Parsons TJ, Yoshino M, Holland MM (2002) A new database of mitochondrial DNA hypervariable regions I and II sequences from 162 Japanese individuals. *Int J Legal Med* 116:68-73.
13. Kolman CJ, Sambuughin N, Bermingham E (1996) Mitochondrial DNA analysis of Mongolian populations and implications for the origin of New World founders. *Genetics* 142:1321-34.
14. Kong Q P, Yao Y G, Sun C, Bandelt H J, Zhu C L, Zhang Y P (2003) Phylogeny of East Asian mitochondrial DNA lineages inferred from complete sequences. *Am J Hum Genet* 73: 671-676.
15. Lee HY, Yoo JE, Park MJ, Chung U, Shin KJ (2006) Mitochondrial DNA control region sequences in Koreans: identification of useful variable sites and phylogenetic analysis for mtDNA data quality control. *Int J Legal Med* 120:5-14.
16. Nasidze I, Quinque D, Dupanloup I, Cordaux R, Kokshunova L, et al. (2005) Genetic evidence for the Mongolian ancestry of Kalmyks. *Am J Phys Anthropol* 128:846-54.
17. Shimada MK, Kim C, Takahashi A, Saitou N, Suzuki M. (2002) Mitochondrial DNA control region sequences for a Buryats population in Russia. *DNA Polymorphism* 10:150-155.

18. Starikovskaya EB, Sukernik RI, Derbeneva OA, Volodko NV, Ruiz-Pesini E, et al. (2005) Mitochondrial DNA diversity in indigenous populations of the southern extent of Siberia, and the origins of Native American haplogroups. *Ann Hum Genet* 69:67-89.
19. Tajima A, Hayami M, Tokunaga K, Juji T, Matsuo M, et al. (2004) Genetic origins of the Ainu inferred from combined DNA analyses of maternal and paternal lineages. *J Hum Genet* 49:187-93.
20. Tanaka M, Cabrera VM, González AM, Larruga JM, Takeyasu T, et al. (2004) Mitochondrial genome variation in eastern Asia and the peopling of Japan. *Genome Res* 14:1832-50.
21. Derenko M, Malyarchuk B, Grzybowski T, Denisova G, Dambueva I, et al. (2007) Phylogeographic analysis of mitochondrial DNA in northern Asian populations. *Am J Hum Genet* 81: 1025-41.
22. Ingman M, Gyllensten U (2007) A recent genetic link between Sami and the Volga-Ural region of Russia. *Eur J Hum Genet* 15: 115-120.
23. Maca-Meyer N, González AM, Larruga JM, Flores C, Cabrera VM (2001) Major genomic mitochondrial lineages delineate early human expansions. *BMC Genet* 2:13.
24. Mishmar D, Ruiz-Pesini E, Golik P, Macaulay V, Clark AG, et al. (2003) Natural selection shaped regional mtDNA variation in humans. *Proc Natl Acad Sci U S A* 100: 171-176.
25. Just RS, Diegoli TM, Saunier JL, Irwin JA, Parsons TJ. (2008) Complete mitochondrial genome sequences for 265 African American and U.S. "Hispanic" individuals. *Forensic Sci Int Genet* 2(3):e45-8.
26. Fagundes NJ, Kanitz R, Bonatto SL. (2008) A reevaluation of the Native American mtDNA genome diversity and its bearing on the models of early colonization of Beringia. *PLoS One* 3(9):e3157
27. Tamm E, Kivisild T, Reidla M, Metspalu M, Smith DG, et al. (2007) Beringian standstill and spread of Native American founders. *PLoS One* 2(9):e829.
28. Achilli A, Perego UA, Bravi CM, Coble MD, Kong QP, et al. (2008) The phylogeny of the four pan-American MtDNA haplogroups: implications for evolutionary and disease studies. *PLoS One* 3(3):e1764.
29. Hartmann A, Thieme M, Nanduri LK, Stempfl T, Moehle C, et al. (2009) Validation of

- microarray-based resequencing of 93 worldwide mitochondrial genomes. *Hum Mutat.* 30(1):115-122.
30. Kumar S, Bellis C, Zlojutro M, Melton PE, Blangero J, et al. Large scale mitochondrial sequencing in Mexican Americans suggests a reappraisal of Native American origins. *BMC Evol Biol.* 11:293.
  31. Behar DM, van Oven M, Rosset S, Metspalu M, Loogväli EL, et al. (2012) A "Copernican" reassessment of the human mitochondrial DNA tree from its root. *Am J Hum Genet* 90(4):675-84.
  32. de Saint Pierre M, Gandini F, Perego UA, Bodner M, Gómez-Carballa A, et al. (2012) Arrival of Paleo-Indians to the southern cone of South America: new clues from mitogenomes. *PLoS One* 7(12):e51311.
  33. Family Tree DNA database.
  34. Ingman M, Kaessmann H, Pääbo S, Gyllensten U (2000) Mitochondrial genome variation and the origin of modern humans. *Nature* 408: 708-713.
  35. Malhi RS, Cybulski JS, Tito RY, Johnson J, Harry H, et al. (2010) Brief communication: mitochondrial haplotype C4c confirmed as a founding genome in the Americas. *Am J Phys Anthropol.* 141(3):494-497.
  36. Perego UA, Angerhofer N, Pala M, Olivieri A, Lancioni H, et al. (2010) The initial peopling of the Americas: a growing number of founding mitochondrial genomes from Beringia. *Genome Res.* 20(9):1174-1179.
  37. Ebenesersdóttir SS, Sigurðsson A, Sánchez-Quinto F, Lalueza-Fox C, Stefánsson K, et al. (2011) A new subclade of mtDNA haplogroup C1 found in Icelanders: evidence of pre-Columbian contact? *Am J Phys Anthropol.* 144(1):92-99.
